# Supplementary material
Source: PubMed Central journal article supplement (PMC5931714)
Supplement: NIHMS958216-supplement-1.pdf [file NIHMS958216-supplement-1.pdf]

**Current Biology, Volume 28**

**Supplemental Information**

**Direct Control of *SPEECHLESS* by PIF4  
in the High-Temperature Response  
of Stomatal Development**

**On Sun Lau, Zhuojun Song, Zimin Zhou, Kelli A. Davies, Jessica Chang, Xin Yang, Shenqi Wang, Doris Lucyshyn, Irene Hui Zhuang Tay, Philip A. Wigge, and Dominique C. Bergmann**

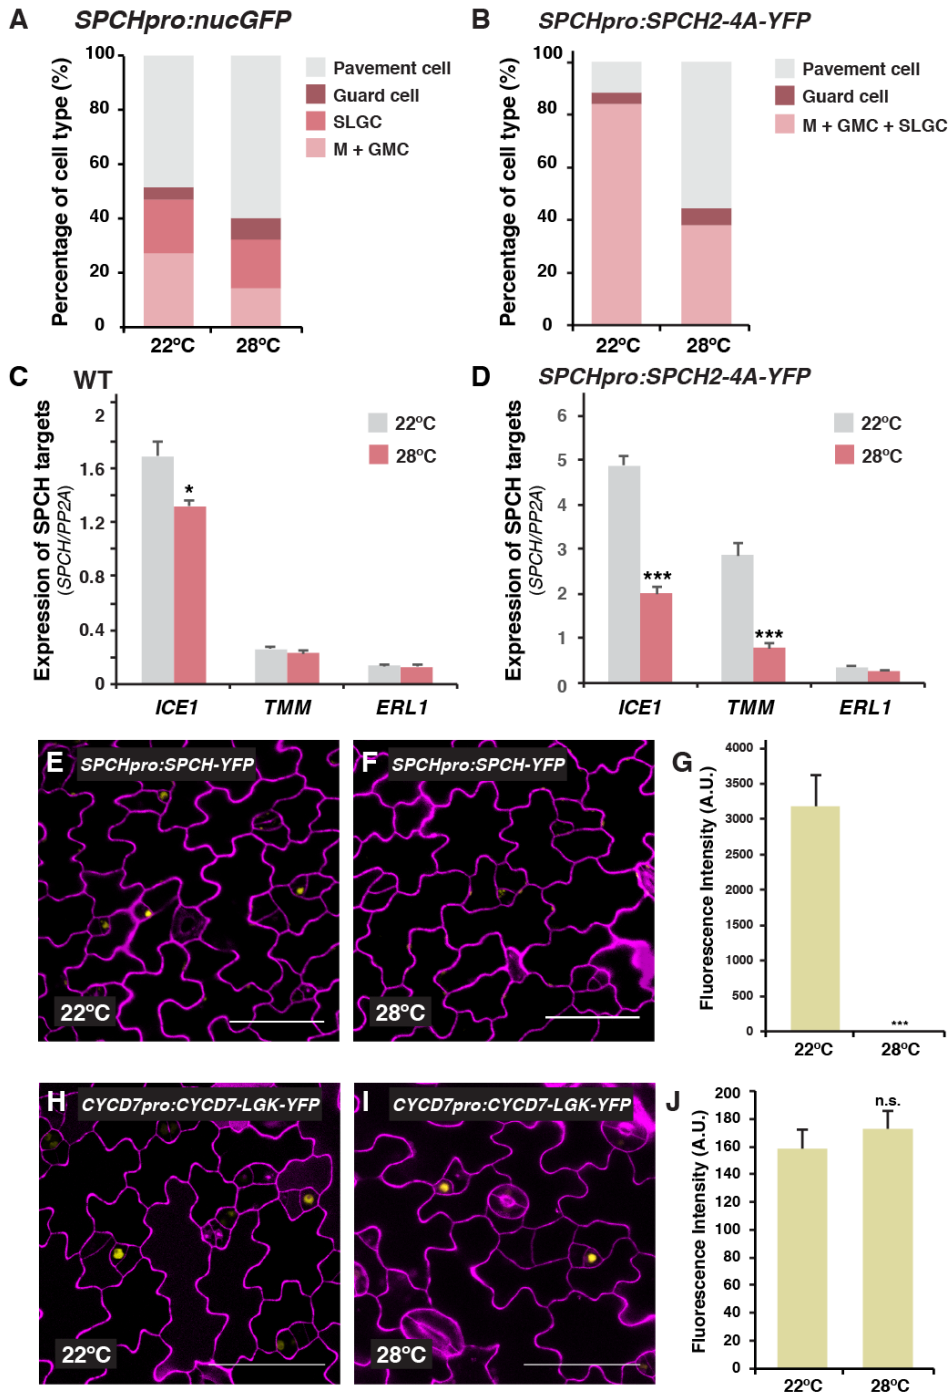

**Figure S1. Effect of high temperature on epidermal cell populations, the expression of *SPCH* targets and the expression of the translational reporter of *SPCH* and *CYCLIND7* (*CYCD7*), Related to Figure 1. (A and B) Quantification of epidermal cell types of 3-day-old abaxial cotyledons of *SPCHpro:nucGFP* (A) and *SPCHpro:SPCH2-4A-YFP* (B) grown at either 22°C or 28°C, using the same samples as in Figure 1C to J. For (B), due to the over-proliferation of the stomatal precursors in *SPCHpro:SPCH2-4A-YFP*, distinguishing meristemoids and SLGCs is challenging and thus they are grouped in one category. M: Meristemoid; GMC: Guard mother cell; SLGC: Stomatal-lineage ground cell. (C and D) Gene expression analysis of three gene targets of *SPCH*: *ICE1*, *TMM*, and *ERL1* [S1] in WT (C) and *SPCHpro:SPCH2-4A-YFP* (D) by RT-qPCR. RNA was extracted from 3-day-old seedlings that were grown at 22°C (grey) or 28°C (red) before harvest. Values are mean +/- SEM, n = 3. Student's t-test (gene-specific comparison), \*\*\*,  $p < 0.001$ ; \*,  $p < 0.05$ . (E to G) Confocal images of 3-day-old abaxial cotyledons of *SPCHpro:SPCH-YFP* grown at either 22°C (E) or 28°C (F). Images were taken with the same acquisition setting, and at this setting, YFP signals from (E) were just below**

saturation while those from (F) were not detectable. Note that images were taken on a different microscope, which has a lower dynamic range, than those from Figure 1. Fluorescence intensity of the YFP-expressing cells are quantified (G) (H to I) Confocal images of 3-day-old abaxial cotyledons of *CYCD7pro:CYCD7-LGK-YFP* [S2,S3] grown at either 22°C (H) or 28°C (I). Fluorescence intensity of the YFP-expressing guard mother cells are quantified (J). The lower number of cells expressing this GMC marker is a secondary effect of fewer stomatal lineage cells being produced at 28°C compared to 22°C. Images were taken with the same laser and acquisition time settings. Cell outlines were visualized with propidium iodide (E, F, H and I; magenta). Scale bar, 50  $\mu$ m. (G, J) Values are mean +/- SEM, n  $\geq$  7. Student's t-test, \*\*\*,  $p < 0.001$ ; n.s., not significant.

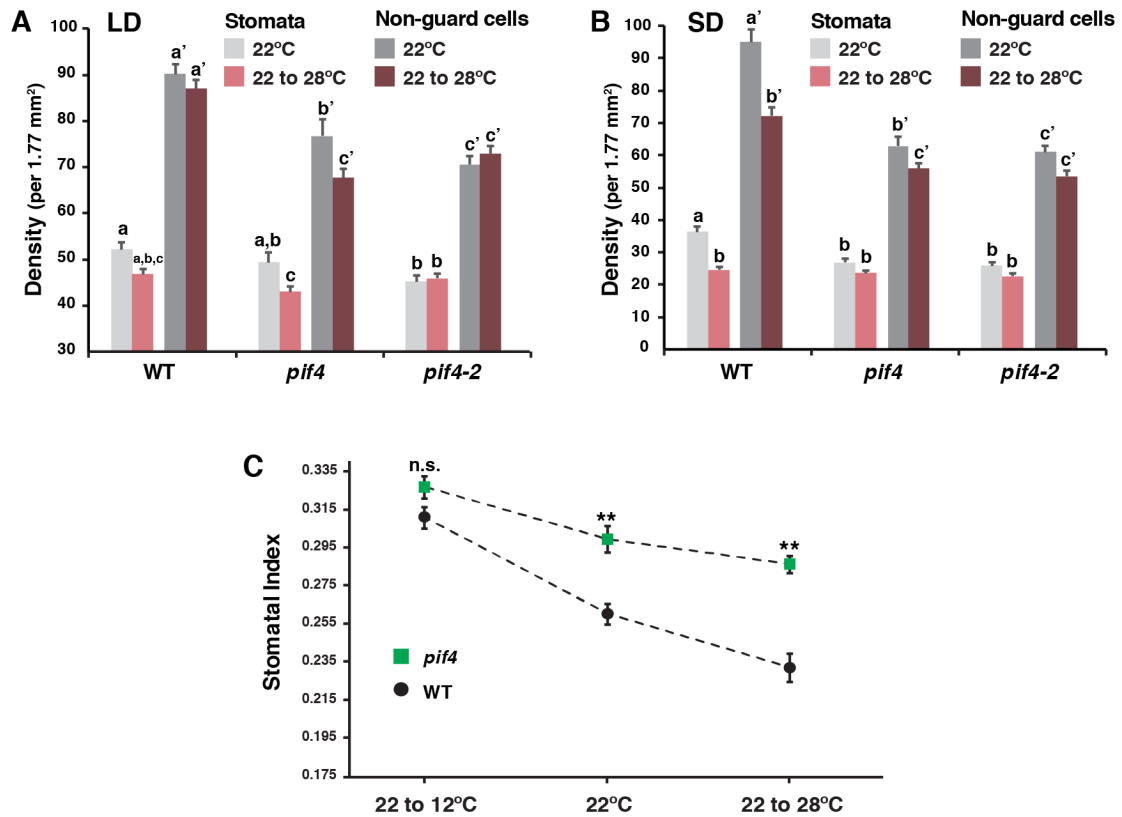

**Figure S2. Number of stomatal and non-stomatal epidermal cells per area (density) of WT and *pif4* mutants grown at standard and high temperature, and the effect of temperature on stomatal development in WT and *pif4*, Related to Figure 2. (A and B) Quantification of stomata and non-stomatal epidermal cell densities in wild-type (WT), *pif4* and *pif4-2* abaxial cotyledons using the same plant samples as in Figure 2A and B (LD: long-day conditions; SD: short-day conditions). Values are mean  $\pm$  SEM,  $n \geq 20$ . One-way ANOVA with post-hoc Tukey HSD (Data from “Stomata” and “Non-guard cells” were tested separately),  $p < 0.05$ . (C) Quantification of stomatal indices of mature abaxial cotyledons of wild-type (WT; black) and *pif4* mutant (green) seedlings. Plants were grown at 22°C for 4 days before transfer to 12°C or 28°C or maintained at 22°C for 10 more days. Data for WT at 22°C and 22 to 28°C are repeated from Figure 1B for ease of comparison to *pif4* here. Values are mean  $\pm$  SEM,  $n \geq 15$ . One-way ANOVA with post-hoc Tukey HSD (SIs of *pif4* were compared to the corresponding WT sample data under the same treatment), \*\*,  $p < 0.01$ ; n.s., not significant.**

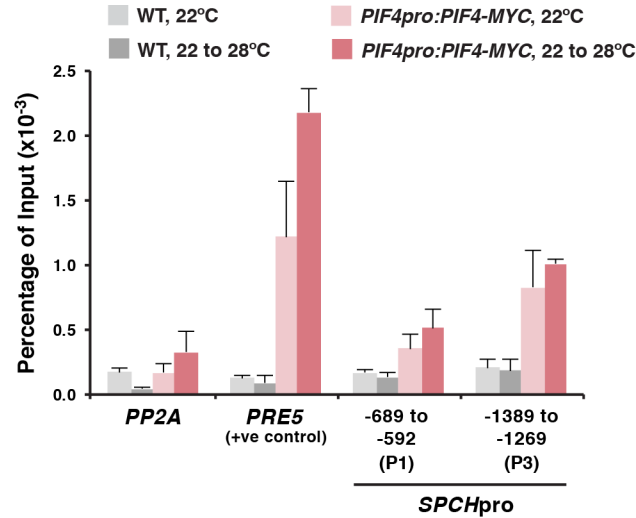

**Figure S3. ChIP-qPCR assays performed with standard method showing enrichment of PIF4 at *SPCH* promoter, Related to Figure 3.** ChIP-qPCR assays were performed on *PIF4pro:PIF4-Myc* and WT using an anti-Myc antibody. Plants were grown for 4 days at 22°C before transferred to 28°C for 4 h or kept at 22°C. Enrichment at the promoter of *SPCH*, notably around 1.3 kb upstream of the start codon, was observed in the PIF4 samples (rightmost). P1 and P3 denote the genomic location annotated in Figure 3D. *PRE5*, a known target of PIF4, was used as a positive control [S4]. *PP2A* represents a randomly selected genomic region as a specificity control. Values are mean +/- SEM (technical replicates), n = 3. Assay was repeated with similar results.

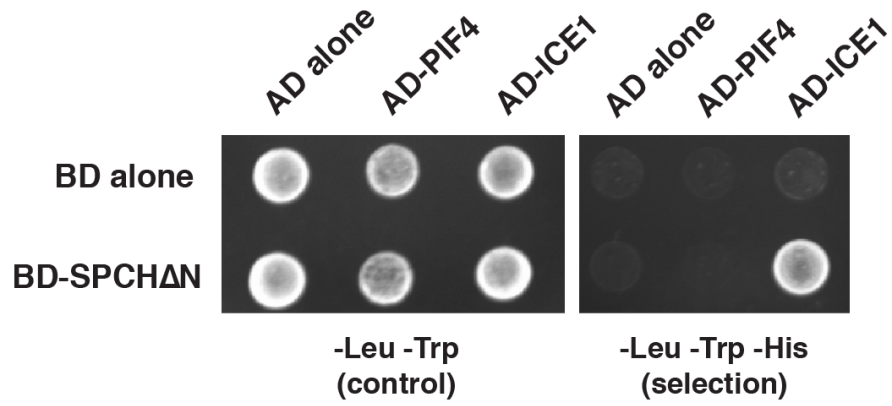

**Figure S4. Yeast two-hybrid assay between SPCH and PIF4, Related to Figure 4.** No protein interaction between SPCH and PIF4 was detected in our yeast two-hybrid assay (no growth on selection medium). The ICE1-SPCHΔN (91 a.a. to 294 a.a.) pair was used as a positive control [S5]. Assay plates were supplemented with 5 mM 3-AT.

**Table S2. List of primers for RT-qPCR and ChIP-qPCR, Related to STAR methods**

| <b>Primers for RT-qPCR</b> (all written from 5' to 3') |                 |                         |                          |                           |
|--------------------------------------------------------|-----------------|-------------------------|--------------------------|---------------------------|
| <b>Gene name</b>                                       | <b>AGI code</b> | <b>Forward primer</b>   | <b>Reverse primer</b>    | <b>Amplicon size (bp)</b> |
| <i>ACTIN2</i>                                          | AT3G18780       | TCTTCCGCTCTTTCTTTCCAAGC | ACCATTGTCACACACGATTGGTTG | 77                        |
| <i>SPCH</i>                                            | AT5G53210       | TCCTTCACCGCCTGTTCTAAGC  | TGAATCTGGTGGTGGTTGATGCG  | 69                        |
| <i>PP2A</i>                                            | AT1G13320       | CAAGTGAACCAGGTTATTGGGA  | ATAGCCAGACGTA CTCTCCAG   | 101                       |
| <i>ICE1</i>                                            | AT3G26744       | GGGTTTGCCTTGGATGTTTT    | ATCATACCAGCATACCCTGC     | 110                       |
| <i>TMM</i>                                             | AT1G80080       | AGCTGAGGCTCAACGATAACA   | CCTCAGCTTTCTCCTCATCCT    | 83                        |
| <i>ERL1</i>                                            | AT5G62230       | CGCATAACTTGCGGGAATTTG   | AGTCCTTGTGCAGCTCCAACC    | 226                       |

  

| <b>Primers for ChIP-qPCR</b> (all written from 5' to 3') |                                              |                         |                                 |                           |
|----------------------------------------------------------|----------------------------------------------|-------------------------|---------------------------------|---------------------------|
| <b>Name in this study</b>                                | <b>Distance from ATG of <i>SPCH</i> (bp)</b> | <b>Forward primer</b>   | <b>Reverse primer</b>           | <b>Amplicon size (bp)</b> |
| P1                                                       | -592                                         | CACGATTGAGGCGCTAAAA     | CAATCCCGGTTTCCAAGTAT            | 98                        |
| P2                                                       | -953                                         | TGCCATCTCATCAGGTGTTT    | CTTCTTTCCCGAGCCATACA            | 105                       |
| P3                                                       | -1269                                        | TTTTGAAAGGGAAAGTTCAAATG | GATGTCATACTAGACGTGCCTCA         | 90                        |
| 5'                                                       | -2667                                        | TCATCTGTCAAAAGCATGTCGT  | GTCACGGTGGTGAAGTTATGAA          | 89                        |
| 5"                                                       | -3166                                        | ACTGCGACCACTTATTGGGTTT  | TGGAATAATTTAAGCTCTCTTTCTC<br>TC | 85                        |
| 3'                                                       | +3000                                        | ACATCATGTTTGGGATGTGAGA  | TTGTGGTTTAAGTTGCATATTCC         | 102                       |

## Supplemental References

- [S1] Lau OS, Davies KA, Chang J, Adrian J, Rowe MH, Ballenger CE, et al. Direct roles of SPEECHLESS in the specification of stomatal self-renewing cells. *Science* 2014;345:1605–9. doi:10.1126/science.1256888.
- [S2] Adrian J, Chang J, Ballenger CE, Bargmann BOR, Alassimone J, Davies KA, et al. Transcriptome dynamics of the stomatal lineage: birth, amplification, and termination of a self-renewing population. *Dev Cell* 2015;33:107–18. doi:10.1016/j.devcel.2015.01.025.
- [S3] Matos JL, Lau OS, Hachez C, Cruz-Ramírez A, Scheres B, Bergmann DC. Irreversible fate commitment in the Arabidopsis stomatal lineage requires a FAMA and RETINOBLASTOMA-RELATED module. *Elife* 2014;3:e03271. doi:10.7554/eLife.03271.
- [S4] Oh E, Zhu J-Y, Wang Z-Y. Interaction between BZR1 and PIF4 integrates brassinosteroid and environmental responses. *Nat Cell Biol* 2012;14:802–9. doi:10.1038/ncb2545.
- [S5] Kanaoka MM, Pillitteri LJ, Fujii H, Yoshida Y, Bogenschutz NL, Takabayashi J, et al. SCREAM/ICE1 and SCREAM2 specify three cell-state transitional steps leading to arabidopsis stomatal differentiation. *Plant Cell* 2008;20:1775–85. doi:10.1105/tpc.108.060848.
